# Supplementary material
Source: MDPI journal article supplement (https://www.mdpi.com/2079-6439/4/2/20)

# Supplementary Information

**3000 rpm**

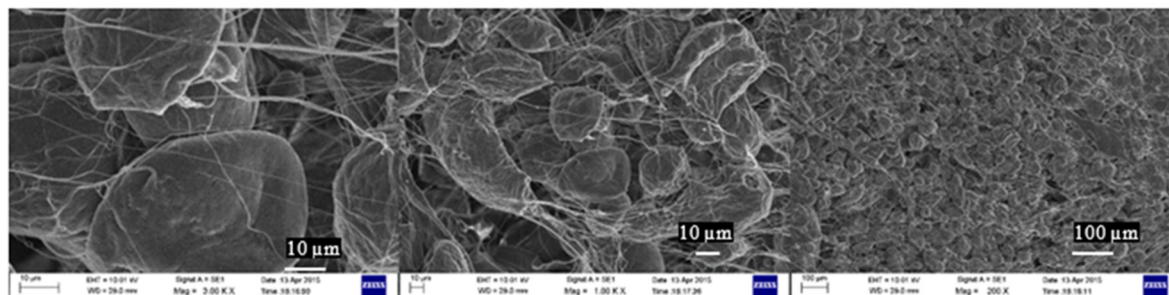

**4000 rpm**

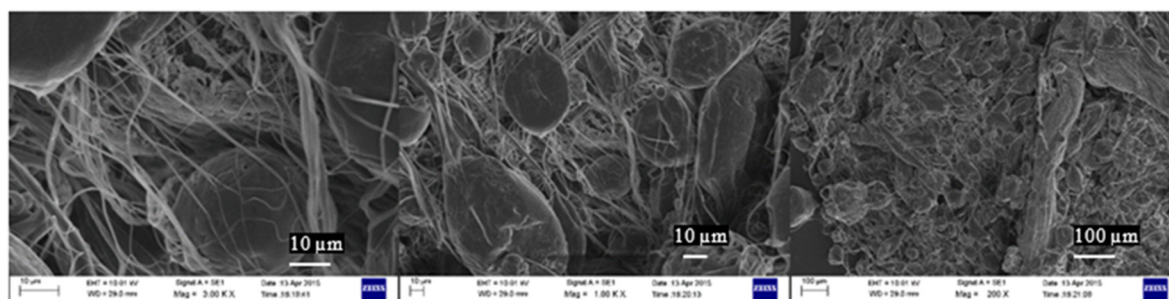

**5000 rpm**

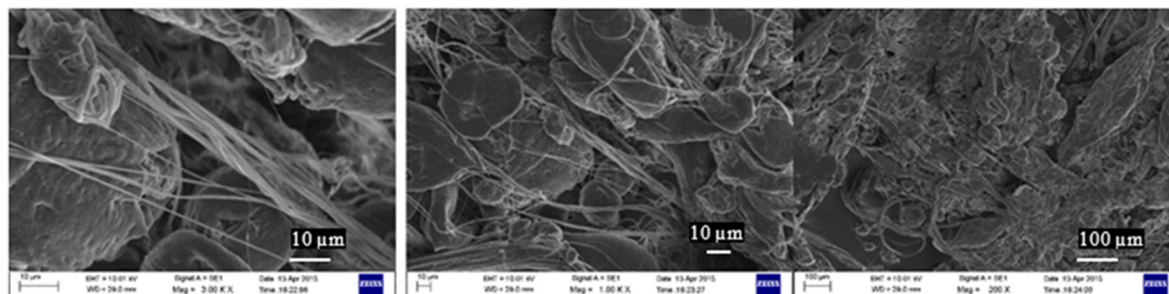

**6000 rpm**

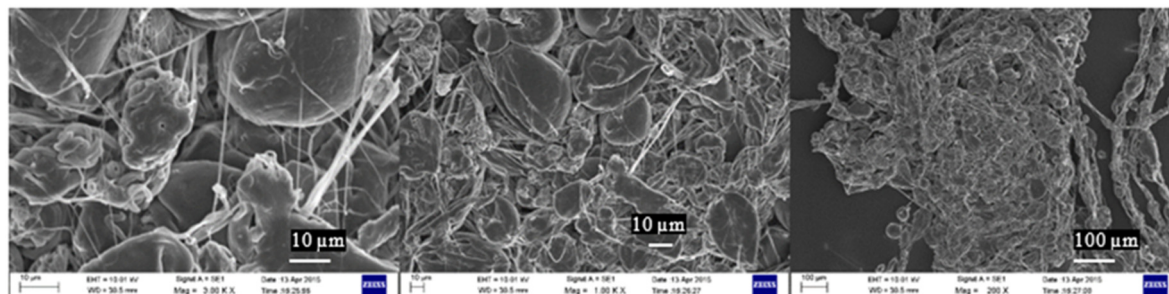

Figure S1. Cont.

7000 rpm

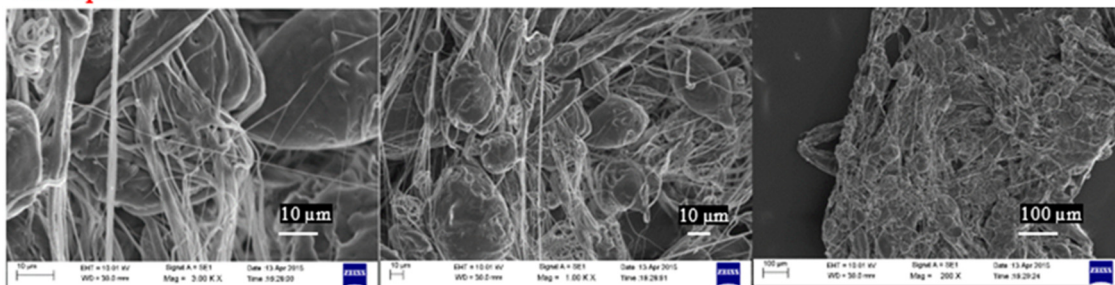

8000 rpm

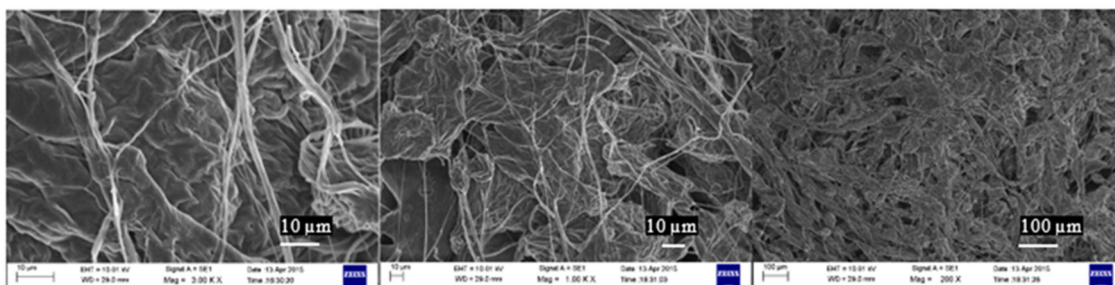

9000 rpm

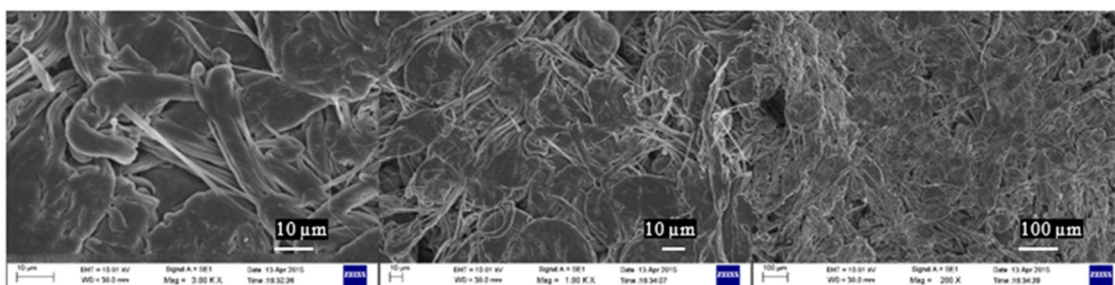

10000 rpm

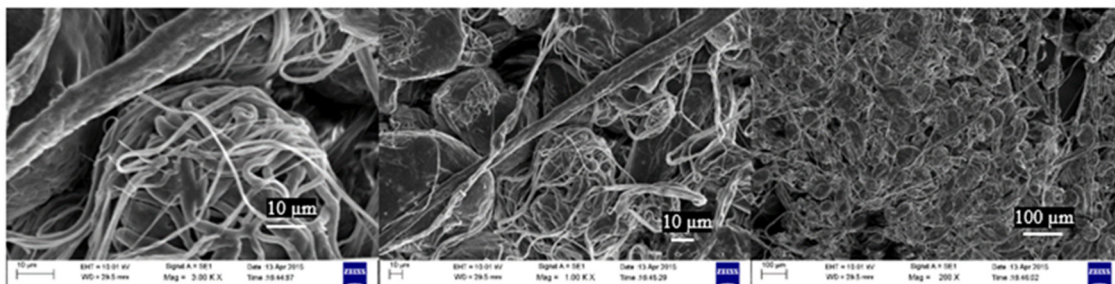

**Figure S1.** SEM images show the fiber formed at 7.5 wt% of PCL concentrations with the solvent mixture ratio of 50:50 (DMF:THF) at different rotational speeds.



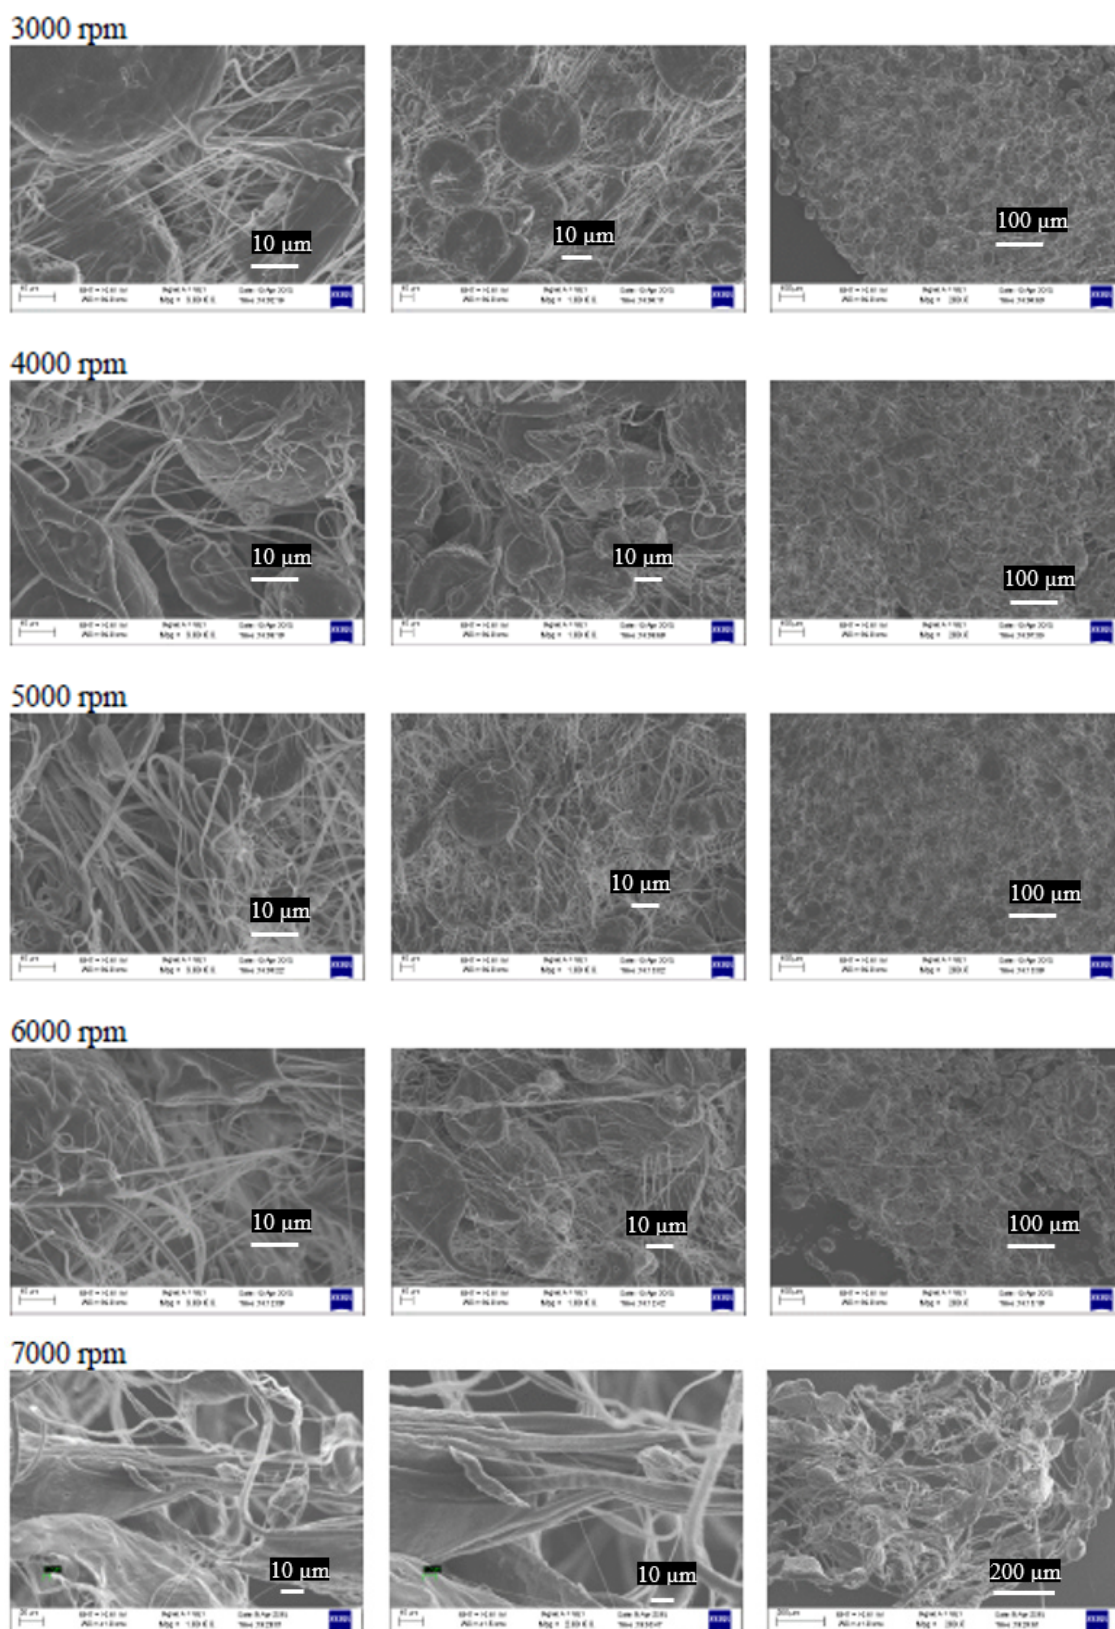

Figure S2. Cont.

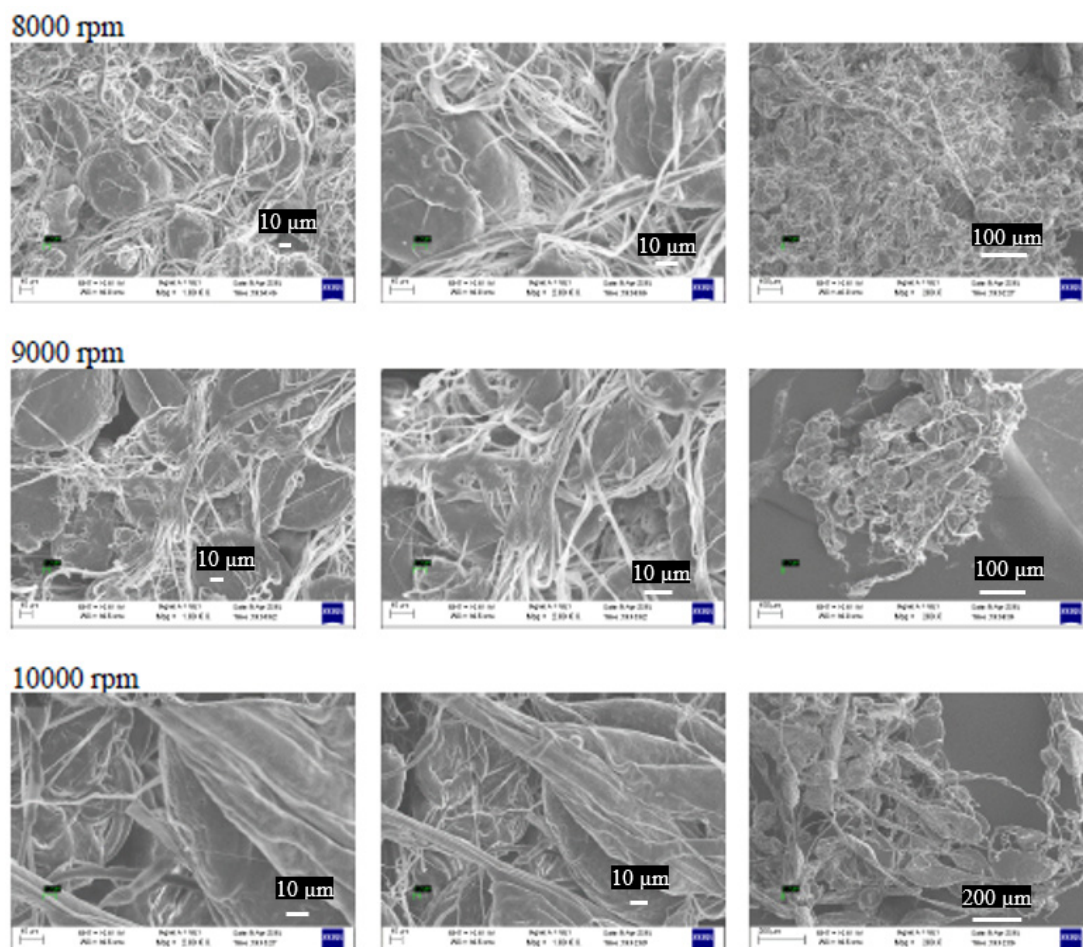

**Figure S2.** SEM images of fibers formed at 10 wt% of PCL concentrations with the solvent mixture ratio of 50:50 (DMF:THF) at different rotational speeds.

**Table S1.** The effect of polymer concentration and rotational speed in fiber formation in 50:50 solvent ratio of DMF:THF.

|              | 1000<br>rpm    | 2000<br>rpm  | 3000<br>rpm             | 4000<br>rpm             | 5000<br>rpm             | 6000<br>rpm             | 7000<br>rpm             | 8000<br>rpm             | 9000<br>rpm             | 10000<br>rpm            |
|--------------|----------------|--------------|-------------------------|-------------------------|-------------------------|-------------------------|-------------------------|-------------------------|-------------------------|-------------------------|
| PCL 7.5 wt%  | No<br>Fibers   | No<br>Fibers | Beads<br>Some<br>Fibers |
| PCL 10 wt%   | No<br>Fibers   | No<br>Fibers | Beads<br>Some<br>Fibers |
| PCL 12.5 wt% | No<br>Fibers   | No<br>Fibers | Beads<br>Some<br>Fibers |
| PCL 15 wt%   | Some<br>Fibers | No<br>Fibers | No<br>Fibers            | No<br>Fibers            | No<br>Fibers            | Beads<br>Some<br>Fibers | Beads<br>Some<br>Fibers | Beads<br>Some<br>Fibers | Beads<br>Some<br>Fibers | Beads<br>Some<br>Fibers |
| PCL 17.5 wt% | No<br>Fibers   | No<br>Fibers | No<br>Fibers            | No<br>Fibers            | Beads<br>Some<br>Fibers | No<br>Fibers            | Beads<br>Some<br>Fibers | No<br>Fibers            | Beads<br>Some<br>Fibers | Beads<br>Some<br>Fibers |



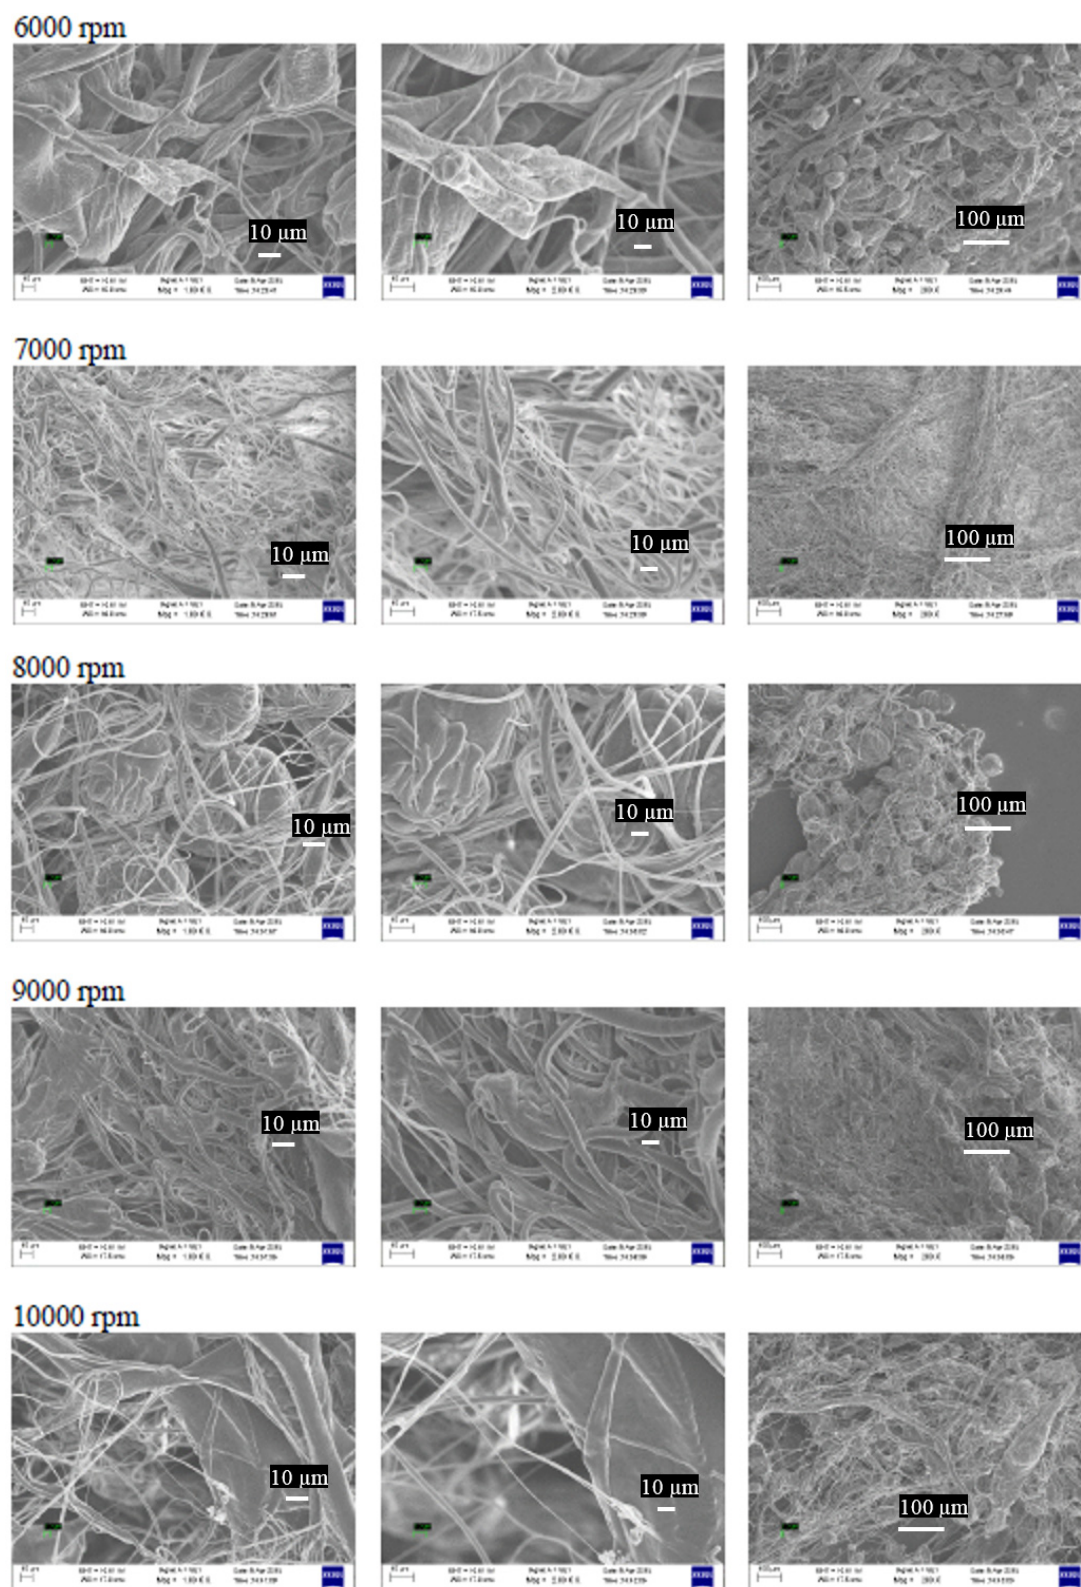

**Figure S3.** SEM images fiber formed at 15 wt% PCL concentrations with the solvent mixture ratio of 50:50 (DMF:THF) at different rotational speeds.

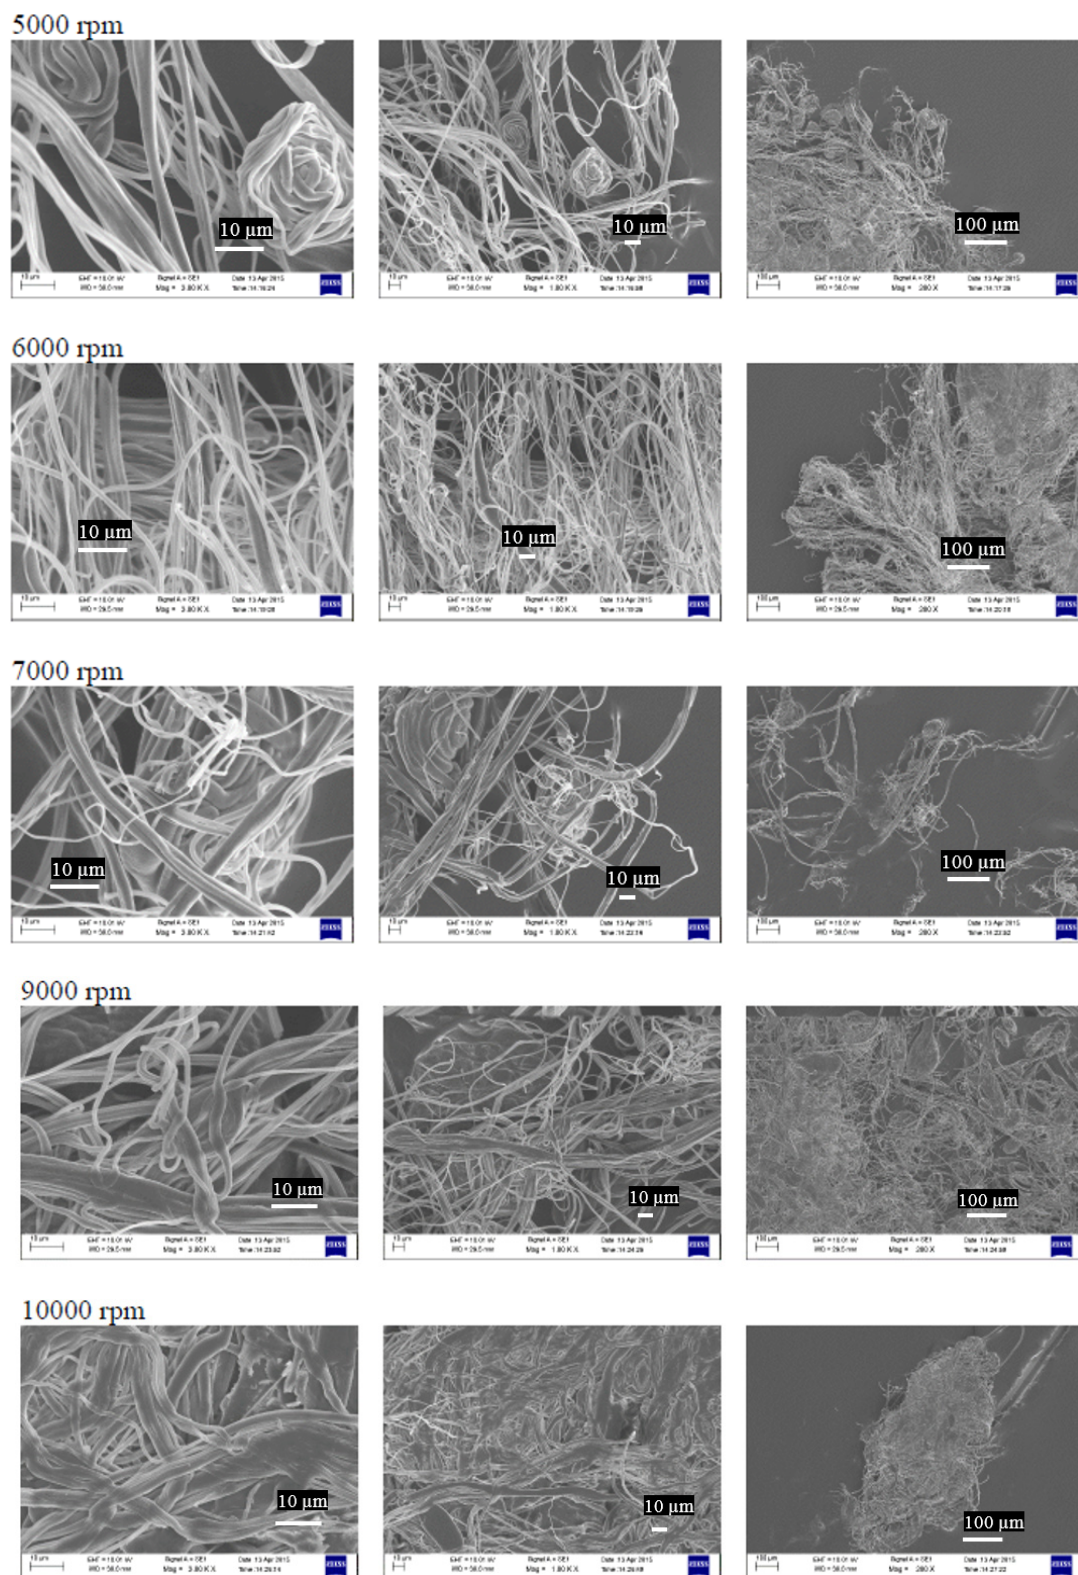

**Figure S4.** SEM images of fibers formed at 17.5 wt% of PCL concentrations with the solvent mixture ratio of 50:50 (DMF:THF) at different rotational speeds.



3000 rpm

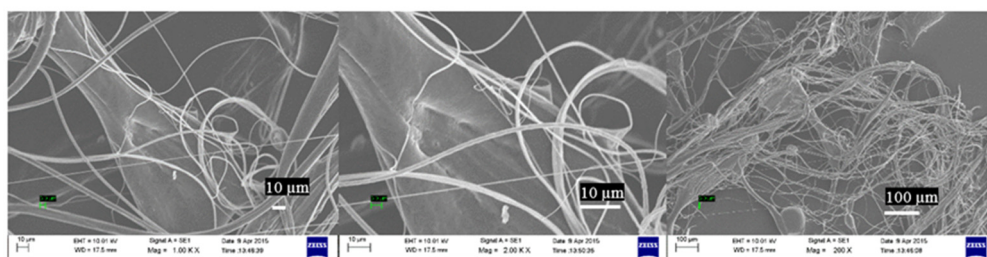

4000 rpm

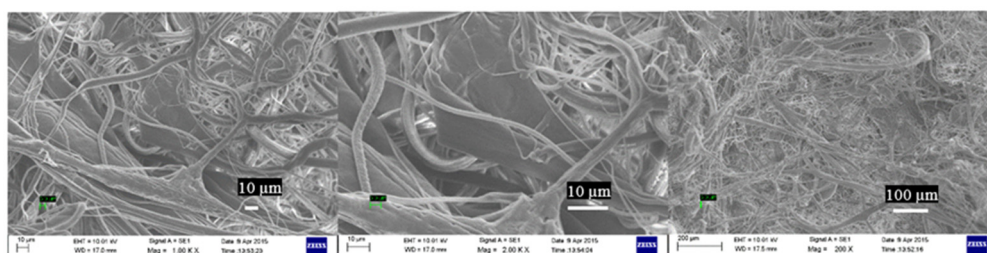

6000 rpm

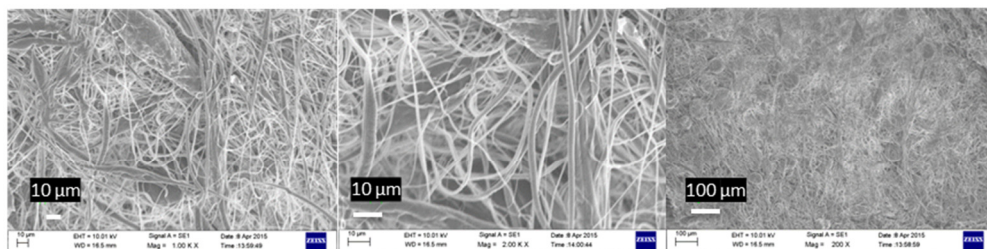

8000 rpm

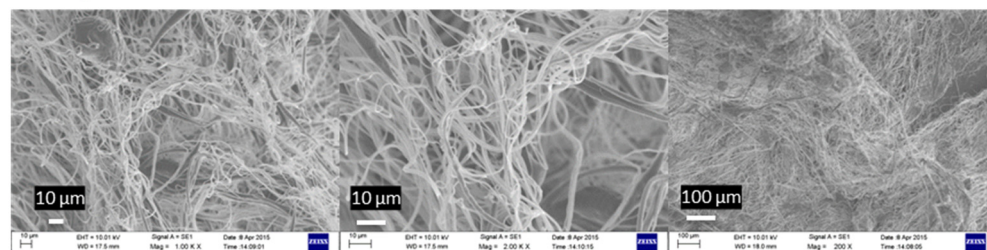

9000 rpm

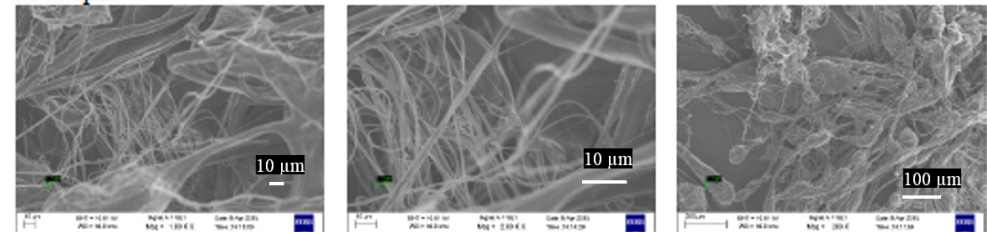

10000 rpm

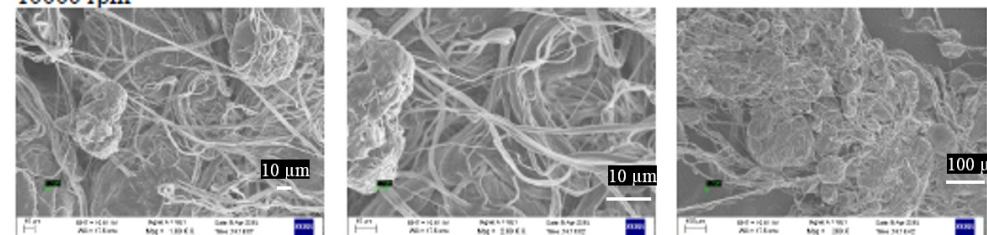

**Figure S5.** SEM images of fibers formed at 12.5 wt% of PCL concentrations with the solvent mixture ratio of 50:50 (DMF:THF) at different rotational speeds.

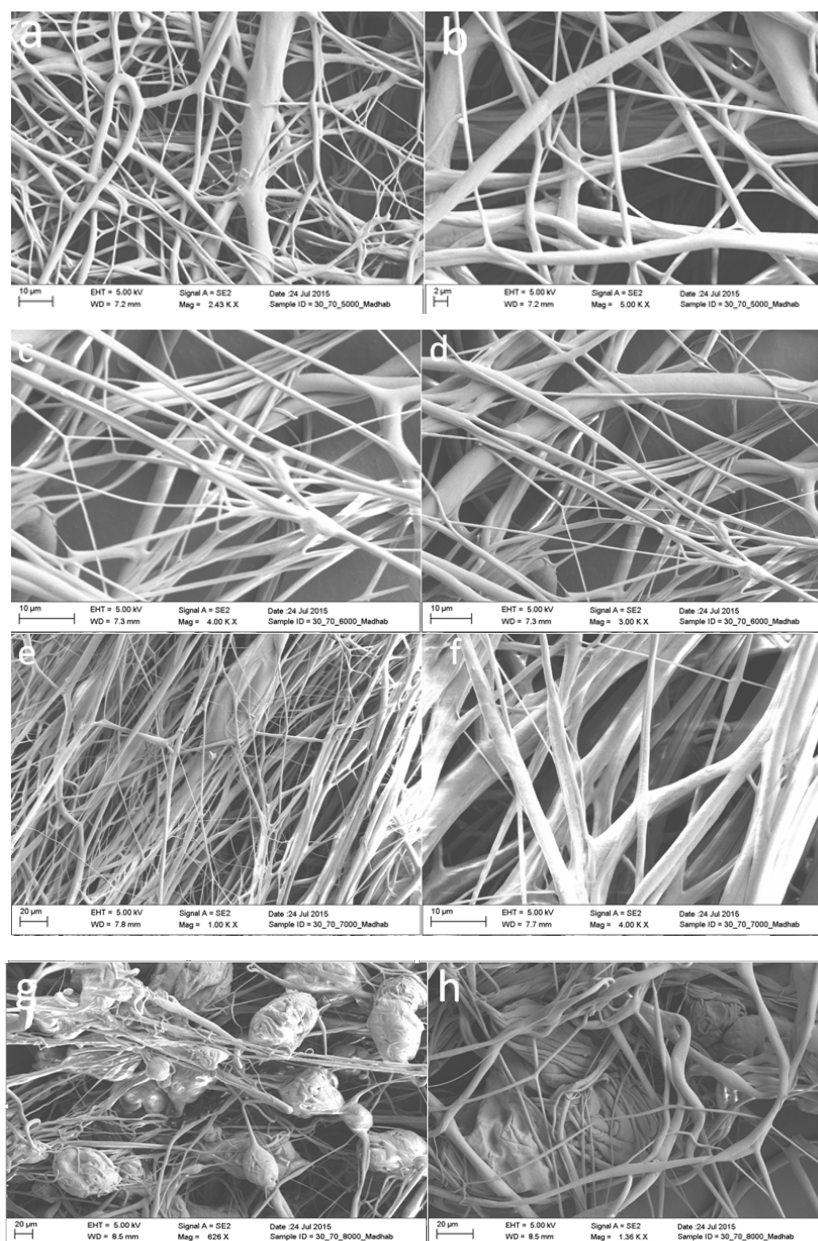

**Figure S6.** SEM images of PCL fibers at solvent 30:70 of DMF:THF at rotational speeds; (a,b) 5000 rpm, (c,d) 6000 rpm; (e,f) 7000rpm; (g,h) 8000 rpm.

**Table S2.** A summary for the fiber formation at different PCL solution concentrations and rotational speeds.

|                                 | 5000 rpm | 6000 rpm | 7000 rpm | 8000 rpm             |
|---------------------------------|----------|----------|----------|----------------------|
| PCL 12.5 wt%<br>(40:60 DMF:THF) | Fibers   | Fibers   | Fibers   | Fibers               |
| PCL 12.5 wt%<br>(30:70 DMF:THF) | Fibers   | Fibers   | Fibers   | Beads Some<br>Fibers |
| PCL 12.5 wt%<br>(THF)           | Fibers   | Fibers   | Fibers   | Fibers               |

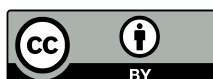

Supplement: s1 [file s1]
